# Supplementary material
Source: MDPI journal article supplement (https://www.mdpi.com/2073-4395/12/10/2542)
Supplement: s1 [file s1]

**Table S1** Primers used in this study.

| Gene Name                       | Primer Sequence (5' - 3')                      |
|---------------------------------|------------------------------------------------|
| Primers used for qRT-PCR        |                                                |
| Solyc01g107300-Q-F              | TGAGGAAGTGCGGAAAGAAGT                          |
| Solyc01g107300-Q-R              | GGCTCAGCAATTATGAACCTGAC                        |
| Solyc01g111730-Q-F              | CAATGTCTGGCGTGCAAGG                            |
| Solyc01g111730-Q-R              | GCGCTCAATATGGGCTTTCC                           |
| Solyc02g083420-Q-F              | CTAGTTGCTCAGCAGTGGCT                           |
| Solyc02g083420-Q-R              | AAGTCTCCCCAAAACAGCCC                           |
| Solyc02g092750-Q-F              | TTGCATCGGATGGCCTATGG                           |
| Solyc02g092750-Q-R              | CTTCTCTGCAGCACCTCAA                            |
| Solyc03g033340-Q-F              | GCTGTGGGATCTTGCTGTCT                           |
| Solyc03g033340-Q-R              | CCCTCACAAGCCTTCCCAAA                           |
| Solyc05g055980-Q-F              | TCAGAGGATCAAGTCAAAGCAGT                        |
| Solyc05g055980-Q-R              | CCTTCACACGCCAAACCTTG                           |
| Solyc06g065920-Q-F              | TTGTCAAGGCTGCTCTCCAT                           |
| Solyc06g065920-Q-R              | TGCACAACGCCTCTTTTTGT                           |
| Solyc09g007080-Q-F              | CCTCGAAACGGTATTGCCCA                           |
| Solyc09g007080-Q-R              | GCCTCCTTACACCTCGTTCG                           |
| Solyc10g049630-Q-F              | AGGCGTCATTTCCACGATGAT                          |
| Solyc10g049630-Q-R              | TGTCCACAGGCGGAGAGATA                           |
| Solyc10g055650-Q-F              | GGGCTAGCTCTGGGAAGGTA                           |
| Solyc10g055650-Q-R              | GGTTGGGGCAAGTGTGTTTC                           |
| Primers used for DNA constructs |                                                |
| Solyc09g007080-BD-F             | atggccatggaggccgaattcATGGTTAAACCTTGCTGGAAACC   |
| Solyc09g007080-BD-F             | atgcggccgctgcaggtcgacCTATCGTTTGGGAGAAGCAGGC    |
| Solyc02g083420-BD-F             | atggccatggaggccgaattcATGTTATCAAGGTTGATAAATTTC  |
| Solyc02g083420-BD-R             | atgcggccgctgcaggtcgacTTATGCGGGAGTGGGAGCCAGAC   |
| Solyc03g033340-BD-F             | atggccatggaggccgaattcATGTTATCAAGGCTGATAAATTTC  |
| Solyc03g033340-BD-R             | atgcggccgctgcaggtcgacTTAAGTGGTACCGAGTTCTATGGG  |
| Solyc10g049630-BD-F             | atggccatggaggccgaattcATGATGAGATTGTGTTATCGGCCG  |
| Solyc10g049630-BD-R             | atgcggccgctgcaggtcgacTTAATAAATTGCCTGTTTTAAGAG  |
| Solyc10g055650-BD-F             | atggccatggaggccgaattcATGGCTGTAGTTCAGGCTAATAATC |

| Gene Name           | Primer Sequence (5' – 3')                        |
|---------------------|--------------------------------------------------|
| Solyc10g055650-BD-R | atgcggccgctgcaggtcgacTTAGGTTGGGGCAAGTGTGTTTCG    |
| SISAUR2-AD-F        | gccatggaggccagtgaattcATGGGTGGTGGAGAGAGAAG        |
| SISAUR2-AD-R        | cagctcgagctcgatggatccTCATGCCCTAAAACACGGCACATG    |
| SISAUR3-AD-F        | gccatggaggccagtgaattcATGTCGATTGAGATTGAAAATTC     |
| SISAUR3-AD-R        | cagctcgagctcgatggatccTCAACACACTGATTTTTTCAGTAC    |
| SISAUR35-AD-F       | gccatggaggccagtgaattcATGGGTACTGGAGAAAAACACC      |
| SISAUR35-AD-R       | cagctcgagctcgatggatccTTAGGCCTTGAAGCACCATGAATGG   |
| SISAUR39-AD-F       | gccatggaggccagtgaattcATGGGCGTTAAAGCAAGCAAATTG    |
| SISAUR39-AD-R       | cagctcgagctcgatggatccTTAATCCGATGCCCTGATTTTTTG    |
| SISAUR40-AD-F       | gccatggaggccagtgaattcATGGATATTCCATCAAACAATAAGC   |
| SISAUR40-AD-R       | cagctcgagctcgatggatccTCATATACTGCACAATTGAGG       |
| SISAUR55-AD-F       | gccatggaggccagtgaattcATGGCTTCTTCTGCTCTATCAAAAAAG |
| SISAUR55-AD-R       | cagctcgagctcgatggatccTTAAACCCTAGTTTTCCGAAGC      |
| SISAUR57-AD-F       | gccatggaggccagtgaattcATGAAGGTGAAGAAAGGATGGC      |
| SISAUR57-AD-R       | cagctcgagctcgatggatccTTAACATGAGTGAAATGACAACG     |
| SISAUR59-AD-F       | gccatggaggccagtgaattcATGGGTCATAATCATCATTTG       |
| SISAUR59-AD-R       | cagctcgagctcgatggatccTCATGCTTTAAAGCACCATGG       |
| SISAUR65-AD-F       | gccatggaggccagtgaattcATGAAGAACTTATTCGACGTTTATCG  |
| SISAUR65-AD-R       | cagctcgagctcgatggatccCTACAGCAAGTCATCGGAGAG       |
| SISAUR70-AD-F       | gccatggaggccagtgaattcATGCTAGGCAAGAAGTTTGGTTC     |
| SISAUR70-AD-R       | cagctcgagctcgatggatccTTATAGAAATTCCTCAACCAAGCC    |
| SISAUR90-AD-F       | gccatggaggccagtgaattcATGGCGAAAGGAGGAAAACACAAAAC  |
| SISAUR90-AD-R       | cagctcgagctcgatggatccTCAGCAAGAGTAAAATTCAACC      |

**Table S2** The accession numbers of SAUR proteins in this study from SGN database.

| Gene name | Gene ID        |
|-----------|----------------|
| SISAUR2   | Solyc01g096340 |
| SISAUR3   | Solyc01g110560 |
| SISAUR35  | Solyc03g082510 |
| SISAUR39  | Solyc03g123550 |
| SISAUR40  | Solyc03g124020 |
| SISAUR55  | Solyc05g046320 |
| SISAUR57  | Solyc05g056440 |
| SISAUR59  | Solyc06g053290 |
| SISAUR65  | Solyc07g066560 |
| SISAUR70  | Solyc09g009980 |
| SISAUR90  | Solyc07g042490 |
